# Supplementary material for: Sources of cosmic dust in the Earth's atmosphere
Source: PubMed Central journal article supplement — Geophys Res Lett. 2016 Dec 14;43(23):11979–86. doi: 10.1002/2016GL071697 (PMC5319002; doi:10.1002/2016gl071697), 2016-12-14
Supplement: GRL-43-11979-s001.pdf [file GRL-43-11979-s001.pdf]

**Sources of Cosmic Dust in the Earth's Atmosphere**

J. D. Carrillo-Sánchez<sup>1</sup>, D. Nesvorný<sup>2</sup>, P. Pokorný<sup>3,4</sup>, D. Janches<sup>4</sup>, J. M. C. Plane<sup>1</sup>

<sup>1</sup>School of Chemistry, University of Leeds, Leeds, UK, <sup>2</sup>Department of Space Studies, Southwest Research Institute, Boulder, Colorado, USA, <sup>3</sup>The Catholic University of America, 620 Michigan Ave, 20064, Washington D.C., USA, <sup>4</sup>Space Weather Laboratory, Mail Code 674, GSFC/NASA, Greenbelt, Maryland, USA

**Contents of this file**

Figure S1 and Table S1

**Introduction**

The purpose of this Supporting Information is to describe the results of fitting the three cosmic dust sources when the JFC particle size distribution with  $D_{\text{break}} = 100 \mu\text{m}$ , derived from IRAS observations of the Zodiacal Cloud, is used [Nesvorný *et al.*, 2011; 2010]. This provides a comparison with the main paper, where the more recent Planck satellite observations with  $D_{\text{break}} = 36 \mu\text{m}$  is used [Ade *et al.*, 2014; Fixsen and Dwek, 2002].

Figure S1 depicts the cumulative mass and size distributions inferred from the JFC-IRAS and JFC-Planck distributions. The Planck distribution has a sharp break at around radius  $= 18 \mu\text{m}$  (i.e.  $D_{\text{break}} = 36 \mu\text{m}$ ), and can be parameterized following a double power law with a differential index of  $-1.4 \pm 0.3$  below the break diameter, and a differential index of  $-4.3 \pm 0.1$  above the break size. In contrast, the IRAS distribution exhibits differential indices of  $-2.7 \pm 1.8$  and  $-4.8 \pm 0.1$  below and above the break diameter, respectively. Thus, as shown in Figures 1a and 1b of the main paper, the JFC-Planck particle mass distribution is shifted  $\sim 2$ -orders of magnitude lower than the JFC-IRAS distribution.

We have assumed the same Na enrichment factor of 2.5 for the IRAS model (termed ZCM-IRAS). Consequently,  $\alpha = 0.41 \pm 0.17$ ,  $\beta = (2.73 \pm 2.00) \times 10^{-2}$ ,  $\gamma = (6.78 \pm 1.72) \times 10^{-2}$ . In terms of the global mass input rate, the contributions of the JFC, AST and LPC particles are  $13.7 \pm 5.7 \text{ t d}^{-1}$  (57%),  $2.9 \pm 2.1 \text{ t d}^{-1}$  (13%) and  $7.4 \pm 1.9 \text{ t d}^{-1}$  (30%), respectively. The Total Input Mass (TIM) for the ZCM-IRAS model is  $24.0 \pm 6.4 \text{ t d}^{-1}$ .

Figure S1

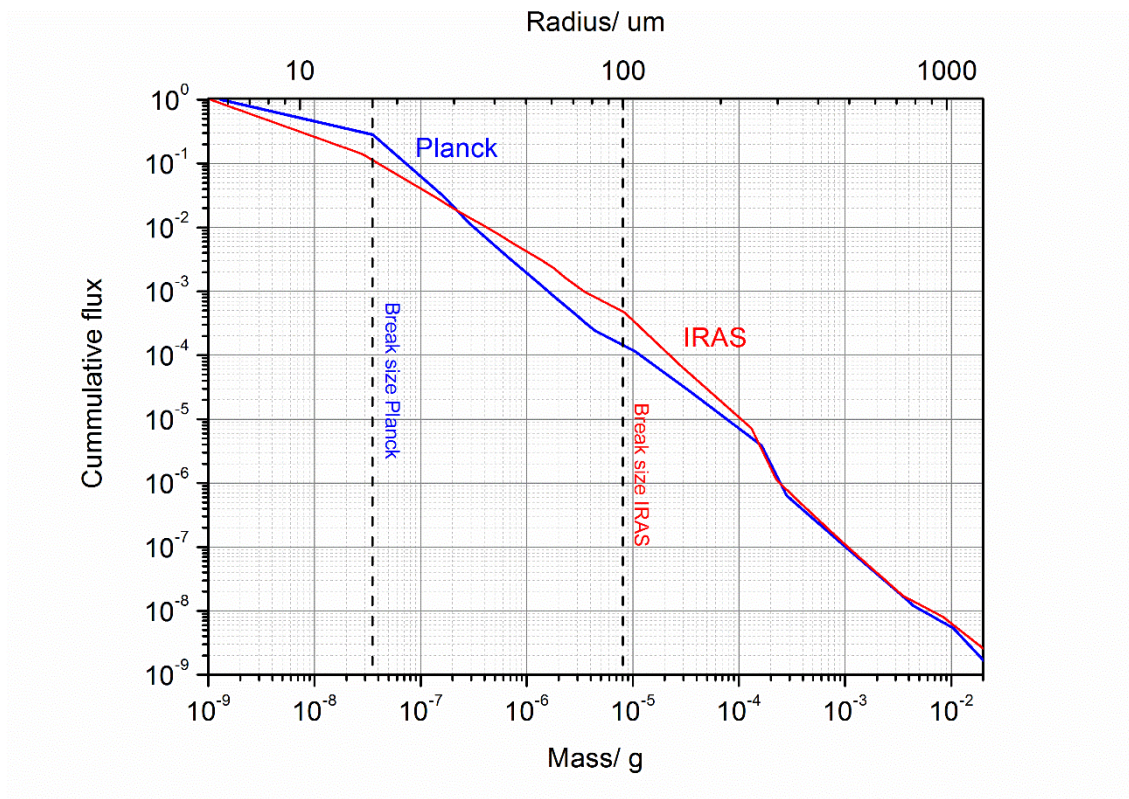

**Figure S1.** Cumulative size/mass distributions of JFC particles inferred from observations of emission from the Zodiacal Cloud by the Planck (blue) and IRAS (red) satellites.

**Table S1.** Global mass input from the four cosmic dust sources for the JFC-IRAS fit. Elemental ablation inputs are italicized; the percentages in parentheses show the fraction of each element that ablates from its total atmospheric input from each source.

| Mass flux                                    | JFC (t d <sup>-1</sup> )                     | AST (t d <sup>-1</sup> )                      | LPC=HTC (t d <sup>-1</sup> )                 | Total (t d <sup>-1</sup> )                   | LPC=OCC (t d <sup>-1</sup> )                  |
|----------------------------------------------|----------------------------------------------|-----------------------------------------------|----------------------------------------------|----------------------------------------------|-----------------------------------------------|
| Unmelted micrometeorites                     | 8.5                                          | 1.0                                           | 0.4                                          | 9.9                                          | 0.07                                          |
| Cosmic spherules                             | 3.1                                          | 1.4                                           | 0.6                                          | 5.1                                          | 0.1                                           |
| Ablated atoms                                | 2.1                                          | 0.5                                           | 6.4                                          | 9.0                                          | 6.5                                           |
| Cosmic spherules <sup>†</sup>                | 2.8                                          | 1.4                                           | 0.4                                          | 4.6                                          | 0.08                                          |
| Unmelted ( $\phi > 50 \mu\text{m}$ )         | 2.4                                          | 0.9                                           | 0.3                                          | 3.6                                          | 0.04                                          |
| <i>Na</i>                                    | <i>0.1 (45%)</i>                             | <i>0.02 (75%)</i>                             | <i>0.1 (99%)</i>                             | <i>0.2 (48%)</i>                             | <i>0.1 (100%)</i>                             |
| <i>K</i>                                     | <i><math>4.9 \times 10^{-3}</math> (44%)</i> | <i><math>1.8 \times 10^{-3}</math> (74%)</i>  | <i><math>5.9 \times 10^{-3}</math> (97%)</i> | <i>0.01 (51%)</i>                            | <i><math>5.6 \times 10^{-3}</math> (100%)</i> |
| <i>Fe</i>                                    | <i>0.8 (20%)</i>                             | <i>0.2 (28%)</i>                              | <i>1.9 (90%)</i>                             | <i>2.9 (43%)</i>                             | <i>1.9 (98%)</i>                              |
| <i>Si</i>                                    | <i>0.3 (13%)</i>                             | <i>0.08 (16%)</i>                             | <i>1.0 (87%)</i>                             | <i>1.4 (37%)</i>                             | <i>1.0 (97%)</i>                              |
| <i>Mg</i>                                    | <i>0.2 (11%)</i>                             | <i>0.05 (11%)</i>                             | <i>0.9 (85%)</i>                             | <i>1.1 (31%)</i>                             | <i>0.9 (97%)</i>                              |
| <i>Ca</i>                                    | <i><math>6.2 \times 10^{-3}</math> (3%)</i>  | <i><math>1.4 \times 10^{-4}</math> (0.4%)</i> | <i>0.07 (70%)</i>                            | <i>0.08 (27%)</i>                            | <i>0.08 (93%)</i>                             |
| <i>Al</i>                                    | <i><math>3.4 \times 10^{-3}</math> (2%)</i>  | <i><math>4.3 \times 10^{-5}</math> (0.1%)</i> | <i>0.06 (59%)</i>                            | <i>0.06 (19%)</i>                            | <i>0.08 (88%)</i>                             |
| <i>Ti</i>                                    | <i><math>3.2 \times 10^{-5}</math> (4%)</i>  | <i><math>1.4 \times 10^{-6}</math> (0.8%)</i> | <i><math>3.7 \times 10^{-4}</math> (84%)</i> | <i><math>4.0 \times 10^{-4}</math> (28%)</i> | <i><math>4.5 \times 10^{-4}</math> (100%)</i> |
| <i>O</i>                                     | <i>0.7 (14%)</i>                             | <i>0.2 (18%)</i>                              | <i>2.4 (90%)</i>                             | <i>3.3 (38%)</i>                             | <i>2.4 (99%)</i>                              |
| <b>Total</b>                                 | <b>13.7</b>                                  | <b>2.9</b>                                    | <b>7.4</b>                                   | <b>24.0</b>                                  | <b>6.7</b>                                    |
| <i>%Na</i> <sub> 87.5 km</sub> <sup>††</sup> | 76%                                          | 46%                                           | 99%                                          | <b>86%</b>                                   | 100%                                          |
| <i>%Fe</i> <sub> 87.5 km</sub> <sup>††</sup> | 39%                                          | 0.9%                                          | 92%                                          | <b>70%</b>                                   | 98%                                           |

<sup>†</sup> Spherules in the size range  $50 \mu\text{m} \leq \phi \leq 700 \mu\text{m}$  corresponding to measurements at South Pole [Taylor et al., 1998].

<sup>††</sup> Fraction of Na and Fe ablated above 87.5 km.

## References

Ade, P. A. R., N. Aghanim, C. Armitage-Caplan, M. Arnaud, M. Ashdown, F. Atrio-Barandela, J. Aumont, C. Baccigalupi, A. J. Banday, R. B. Barreiro, et al. (2014), Planck 2013 results. XIV. Zodiacal emission, *Astron. Astrophys.*, 571, art. no.: A14.

Fixsen, D. J., and E. Dwek (2002), The Zodiacal Emission Spectrum as Determined by COBE and Its Implications, *Astrophys. J.*, 578, 1009–1014.

Nesvorný, D., D. Janches, D. Vokrouhlický, P. Pokorný, W. F. Bottke, and P. Jenniskens (2011), Dynamical Model for the Zodiacal Cloud and Sporadic Meteors, *Astrophys. J.*, 743 (2), 129-144.

Nesvorný, D., P. Jenniskens, H. F. Levison, W. F. Bottke, D. Vokrouhlický, and M. Gounelle (2010), Cometary Origin of the Zodiacal Cloud and Carbonaceous Micrometeorites. Implications for Hot Debris Disks, *Astrophys. J.*, 713, 816-836.

Taylor, S., J. H. Lever, and R. P. Harvey (1998), Accretion rate of cosmic spherules measured at the South Pole, *Nature*, 392, 899-903.
